# Supplementary material
Source: PubMed Central journal article supplement (PMC9391315)
Supplement: NIHMS1817664-supplement-1.pdf [file NIHMS1817664-supplement-1.pdf]

## Journal of Hepatology

### CTAT methods

Tables for a “Complete, Transparent, Accurate and Timely account” (CTAT) are now mandatory for all revised submissions. The aim is to enhance the reproducibility of methods.

- Only include the parts relevant to your study
- Refer to the CTAT in the main text as ‘Supplementary CTAT Table’
- Do not add subheadings
- Add as many rows as needed to include all information
- Only include one item per row

### 1.1 Antibodies

| Name                                                              | Citation | Supplier  | Cat no.  | Clone no. |
|-------------------------------------------------------------------|----------|-----------|----------|-----------|
| anti-mouse PD-1 in vivo blocking antibody                         |          | Bioxcell  | BE0273   | 29F.1A12  |
| Rat IgG2a isotype control in vivo                                 |          | Bioxcell  | BP0089   | 2A3       |
| anti-mouse CD4 in vivo depletion antibody                         |          | Bioxcell  | BE0003-1 | GK1.5     |
| anti-mouse PD-L1 in vivo blocking antibody                        |          | Bioxcell  | BP0101   | 10F.9G2   |
| Rat IgG2b isotype control in vivo                                 |          | Bioxcell  | BP0090   | LTF-2     |
| anti-mouse VEGFR2 in vivo blocking antibody                       |          | Bioxcell  | BP0060   | DC101     |
| Rat IgG1 isotype control in vivo                                  |          | Bioxcell  | BP0088   | HRPN      |
| anti-mouse CD8 in vivo depletion antibody                         |          | Bioxcell  | BP0061   | 2.43      |
| anti-mouse CD31 monoclonal antibody, Immune fluorescence staining |          | Biolegend | 102516   | MEC13.3   |
| anti-mouse CD8 monoclonal antibody, Immune fluorescence staining  |          | Biolegend | 100702   | 53-6.7    |
| BV605 anti-mouse CD3                                              |          | Biolegend | 100237   | 17A2      |
| Alexa Fluor700 anti-mouse CD8a                                    |          | Biolegend | 100729   | 53-6.7    |
| PE/Cyanine7 anti-mouse CD44                                       |          | Biolegend | 103029   | IM7       |

|                                     |  |                       |            |          |
|-------------------------------------|--|-----------------------|------------|----------|
| PerCP/Cyanine5.5 anti-mouse CD62L   |  | Biologend             | 104431     | MEL-14   |
| FITC anti-mouse PD-1                |  | Invitrogen            | 11-9985-82 | J43      |
| PE anti-mouse PD-1                  |  | Invitrogen            | 12-9981-82 | RMP1-30  |
| PB anti-mouse Tim3                  |  | Biologend             | 119723     | RMT3-23  |
| Alexa Fluor700 anti-mouse CD4       |  | Biologend             | 100429     | GK1.5    |
| Brilliant Violet421 anti-mouse CD8a |  | Biologend             | 100737     | 53-6.7   |
| APC anti-mouse IFN-g                |  | Biologend             | 505809     | XMG1.2   |
| PE anti-mouse TNF $\alpha$          |  | Biologend             | 506306     | MP6-XT22 |
| FITC anti-mouse Granzyme B          |  | Biologend             | 515403     | GB11     |
| PE/Cyanine7 anti-mouse CXCR6        |  | Biologend             | 151103     | SA051D1  |
| APC/Fire 570 anti-mouse TCR $\beta$ |  | Biologend             | 109246     | H57-597  |
| APC anti-mouse CD1d Tetramer        |  | NIH Tetramer Facility | 40239      | N/A      |
| AF594 anti-mouse CD8                |  | Biologend             | 100758     | 53-6.7   |
| AF647 anti-mouse CD31               |  | Biologend             | 102516     | MEC13.3  |

## 1.2 Cell lines

| Name    | Citation                        | Supplier                            | Cat no.  | Passage no.                                                              | Authentication test method                                                                                                      |
|---------|---------------------------------|-------------------------------------|----------|--------------------------------------------------------------------------|---------------------------------------------------------------------------------------------------------------------------------|
| CT26    | Cancer Res. 1980; 40, 2142-2146 | ATCC                                | CRL-2638 | Within 5 passages after thawing, tumor cells were used for in vivo assay | Authentication performed by supplier                                                                                            |
| RIL-175 | J Hepatol. 2019; 70, 449-457    | Scott Lowe / Lars Zender in Germany | N/A      | Within 5 passages after thawing, tumor cells were used for in vivo assay | Authentication was performed by i) pathology analysis of RIL-175 tumor confirms HCC morphology and ii) by luciferase expression |

## 1.3 Organisms

| Name                  | Citation                        | Supplier           | Strain                  | Sex | Age                                   | Overall n number |
|-----------------------|---------------------------------|--------------------|-------------------------|-----|---------------------------------------|------------------|
| Wild type mice        |                                 | Charles River      | C57BL/6                 | F   | 8-10 week old when received treatment | 443              |
| Wild type mice        |                                 | Charles River      | BALB/c                  | F   | 8-10 week old when received treatment | 94               |
| Albino C57BL/6        |                                 | Jackson Laboratory | B6(Cg)-Tyr<c-2J>/J      | F   | 8-10 week old when received treatment | 80               |
| B6.CXCR6-GFP knock-in | J Immunol. 2013; 190, 5226-5236 | Jackson Laboratory | B6.129P2-Cxcr6tm1Litt/J | F   | 8-10 week old when received treatment | 16               |

## 1.4 Sequence based reagents

| Name                             | Sequence                                                                      | Supplier                                    |
|----------------------------------|-------------------------------------------------------------------------------|---------------------------------------------|
| RNeasy Mini Kit                  | N/A                                                                           | Miltenyi Biotec (Ref. 74104)                |
| nCounter Metabolic Pathway Panel | N/A                                                                           | Nanostring technology (Ref. XT-CSO-MMP1-12) |
| iScript™ cDNA synthesis kit      | N/A                                                                           | BIO-RAD (Ref. 170-8891)                     |
| iQ SYBR Green Supermix           | N/A                                                                           | BIO-RAD (Ref. 1708882)                      |
| Fbp1                             | Forward 5'-GCATCGCACAGCTCTATGGT-3',<br>Reverse 5'-ACAGGTAGCGTAGGACGACT-3'     | Eurofins Genomics                           |
| Pck1                             | Forward 5'-AATATGACAACCTGTTGGCTG-3',<br>Reverse 5'-AATAGCTTTCTCAAAGTCCTC-3'   | Eurofins Genomics                           |
| Mpc1                             | Forward 5'-GGTACAACCTCGAACTGG-3',<br>Reverse: 5'-TCAAGAGCTGGTCCTTGTACC-3'     | Eurofins Genomics                           |
| Adh1                             | Forward 5'-GCTATGGCTCTGCCGTCAAAGT-3',<br>Reverse 5'-TGTCCACAGCAATGATCCTGGC-3' | Eurofins Genomics                           |
| Aldh2                            | Forward 5'-GAGGACTGTGTTGGGAGGTC-3',                                           | Eurofins Genomics                           |

|       |                                                                                          |                   |
|-------|------------------------------------------------------------------------------------------|-------------------|
|       | Reverse 5'<br>GTAGGTCCGGTCCCGTTC-3'                                                      |                   |
| Adh4  | Forward 5'-<br>GCTATGGCTCTGCCGTCAAAGT-<br>3', Reverse 5'-<br>TGTCCACAGCAATGATCCTGGC-3'   | Eurofins Genomics |
| GAPDH | Forward 5'-CCT GCA CCA CCA<br>ACT GCT TA-3', Reverse 5'-TCA<br>TGA GCC CTT CCA CAA TG-3' | Eurofins Genomics |

## 1.5 Biological samples

N/A

## 1.6 Deposited data

| Name of repository                    | Identifier | Link                                                                                                                                    |
|---------------------------------------|------------|-----------------------------------------------------------------------------------------------------------------------------------------|
| NCBI Gene Expression Omnibus database | GSE184231  | <a href="https://www.ncbi.nlm.nih.gov/geo/query/acc.cgi?acc=GSE184231">https://www.ncbi.nlm.nih.gov/geo/query/acc.cgi?acc=GSE184231</a> |

## 1.7 Software

| Software name              | Manufacturer               | Version |
|----------------------------|----------------------------|---------|
| FlowJo                     | Becton Dickinson & Company | 10.6.2  |
| Prism                      | GraphPad Software, LLC.    | 8.4     |
| Advanced Analyses software | Nanostring Technologies    | 2.0.115 |
| Imaris software            | Bitplane AG                | 9.5.1   |

## 1.8 Other (e.g. drugs, proteins, vectors etc.)

| Name                                                                                                          | Manufacturer                            | Purpose                      |
|---------------------------------------------------------------------------------------------------------------|-----------------------------------------|------------------------------|
| Metformin 1,1-Dimethylbiguanide hydrochloride                                                                 | Sigma-Aldrich (Ref. D150959-5G)         | For invivo treatment         |
| Western diet                                                                                                  | Envigo (Ref. TD.120528)                 | For invivo treatment         |
| MCD                                                                                                           | Research diets (Ref. A02082002BR)       | For invivo treatment         |
| CDA                                                                                                           | Dyets inc (Ref. 518753)                 | For invivo treatment         |
| Leukocyte activation cocktail (Phorbol 12-Myristate 13-Acetate [PMA], ionomycin and GolgiPlug™ [Brefeldin A]) | Bioscience (Ref. 51-2042 <sup>E</sup> ) | For invitro T cell treatment |
| 2-(N-(7-Nitrobenz-2-oxa-1,3-diazol-4-yl)Amino)-2-Deoxyglucose                                                 | Invitrogen (Ref. N1395)                 | For Glucose uptake staining  |

|                                                 |                                      |                                  |
|-------------------------------------------------|--------------------------------------|----------------------------------|
| MitoTracker Deep Red                            | Invitrogen (Ref. M22426)             | For mitochondrial staining       |
| MitoTracker Deep Green                          | Invitrogen (Ref. C2925)              | For mitochondrial staining       |
| MTT Cell Proliferation Kit                      | Abcam (Ref. ab211091)                | For invitro experiment           |
| DAPI                                            | Abcam (Ref. ab138903)                | For immune fluorescence staining |
| CellTracker Deep Red                            | Invitrogen (Ref. C34565 A)           | For invitro experiment           |
| CellTracker Green                               | Invitrogen (Ref. C2925)              | For invitro experiment           |
| Bovine PureCol                                  | Advanced Biomatrix (Ref. 5005-100ml) | For invitro experiment           |
| Microscopy Dish                                 | MatTek (Ref. P35G-1.5-14.C)          | For invitro experiment           |
| Mouse CD8 <sup>+</sup> AutoMACS pro sorting kit | Miltenyi Biotec (Ref. 130-104-075)   | For invitro experiment           |

**1.9 Please provide the details of the corresponding methods author for the manuscript:**

Tim F. Greten, Email: [tim.greten@nih.gov](mailto:tim.greten@nih.gov) Tel: +1 (240) 760 6114

**2.0 Please confirm for randomised controlled trials all versions of the clinical protocol are included in the submission. These will be published online as supplementary information.**

N/A
